# Supplementary material
Source: PubMed Central journal article supplement (PMC7286623)
Supplement: supp_8.2.E420_2019-0221-1-at.pdf [file supp_8.2.E420_2019-0221-1-at.pdf]

Appendix 1 (as supplied by the authors): Recruitment material

## Retin**👁**blastoma Research Priority Setting

**Have you, a family member or friend been diagnosed with retinoblastoma? Or are you a health professional or researcher interested in retinoblastoma?**

YOU can shape the future of retinoblastoma research!  
We want to determine “top 10” retinoblastoma research priorities and we need your help.

### What's Involved?

1

Share questions about retinoblastoma that you would like to see answered by research \*

➔

2

Rank all the questions collected during Step 1 \*

➔

3

Participate in a workshop  
December 9, 2017  
to determine the final “top 10” retinoblastoma research priorities

\*Surveys are available in print upon request.

**To complete the survey visit:**  
[www.rbresearch.ca](http://www.rbresearch.ca)

**For more information:**  
416.813.7654x2032387  
[retinoblastoma.research@sickkids.ca](http://retinoblastoma.research@sickkids.ca)  
@RB\_Research  
<http://rbresearch.ca>

**Supporters:**

Version 2  
September 26, 2017

**B**

Tired of retinoblastoma research that doesn't address your questions?

Help us determine the top 10 retinoblastoma research priorities.

#prioritEYESRB

**C**

You can shape the future of retinoblastoma research!

#prioritEYESRB

**D**

What questions about retinoblastoma do you want answered by research?

#prioritEYESRB
