# Supplementary material
Source: PubMed Central journal article supplement (PMC7286623)
Supplement: supp_8.2.E420_gripp2.pdf [file supp_8.2.E420_gripp2.pdf]

**GRIPP2 Short Form**

| <b>Section and Topic</b>            | <b>Item</b>                                                                                                                               | <b>Reported on Page Number</b> |
|-------------------------------------|-------------------------------------------------------------------------------------------------------------------------------------------|--------------------------------|
| 1: Aim                              | Report the aim of patient and public involvement (PPI) in the study                                                                       | 6                              |
| 2: Methods                          | Provide a clear description of the methods used for PPI in the study                                                                      | 10-11                          |
| 3: Study results                    | Outcomes - Report the results of PPI in the study, including both positive and negative outcomes                                          | 11-13                          |
| 4: Discussion and conclusions       | Outcomes - Comment on the extent to which PPI influenced the study overall. Describe positive and negative effects                        | 13-16                          |
| 5: Reflections/critical perspective | Comment critically on the study, reflecting on the things that went well and those that did not, so others can learn from this experience | 16                             |
