# Supplementary material
Source: PubMed Central journal article supplement (PMC7286623)
Supplement: supp_8.2.E420_REPRISE-checklist.pdf [file supp_8.2.E420_REPRISE-checklist.pdf]

**Reporting guideline for health research priority setting with stakeholders (REPRISE)**

| <i>No</i>                               | <i>Item</i>                                                                 | <i>Descriptor and/or examples</i>                                                                                                                                                                                  | <i>Reported on Page Number</i> |
|-----------------------------------------|-----------------------------------------------------------------------------|--------------------------------------------------------------------------------------------------------------------------------------------------------------------------------------------------------------------|--------------------------------|
| <b>A Context and scope</b>              |                                                                             |                                                                                                                                                                                                                    |                                |
| 1                                       | Define geographical scope                                                   | Global, regional, national, city, local area, institutional/organizational level, health service                                                                                                                   | 7                              |
| 2                                       | Define health area, field, focus                                            | Disease or condition specific, interventions, healthcare delivery, health system                                                                                                                                   | 7                              |
| 3                                       | Define the intended beneficiaries                                           | This may include the general population or a specific population based on demographic (age, gender), clinical (disease, condition), or other characteristics who may benefit from the research                     | 7                              |
| 4                                       | Define the target audience of the priorities                                | Policy makers, funders, researchers, industry or others who have the potential to implement the priorities identified                                                                                              | 17                             |
| 5                                       | Identify the research area                                                  | Public health, health services research, clinical research, basic science                                                                                                                                          | 9                              |
| 6                                       | Identify the type of research questions                                     | Etiology, diagnosis, prevention, treatment (interventions), prognosis, health services, psychosocial, behavioral and social science, economic evaluation, implementation; this may not be pre-defined              | 9                              |
| 7                                       | Define the time frame                                                       | Interim, short-term, long-term priorities, plans to revise and update                                                                                                                                              | 9                              |
| <b>B Governance and team</b>            |                                                                             |                                                                                                                                                                                                                    |                                |
| 8                                       | Describe the selection and structure of the leadership and management team  | Those responsible for initiating, developing, and guiding the process for priority setting, and examples of structures include; Steering Committee, Advisory Group, Technical Experts                              | 7                              |
| 9                                       | Describe the characteristics of the team                                    | Stakeholder group or role, institutional affiliations, country or region, demographics (e.g. age sex), discipline, experience, expertise                                                                           | 22                             |
| 10                                      | Describe any training or experience relevant to conducting priority setting | Consultants or advisors, members with experience or skills relevant to the conducting priority-setting e.g. qualitative methods, surveys, facilitation                                                             | 10                             |
| <b>C Framework for priority setting</b> |                                                                             |                                                                                                                                                                                                                    |                                |
| 11                                      | State the framework used (if any)                                           | James Lind Alliance, COHRED, CHNRI, Dialogue Model, no framework (general research priority setting)                                                                                                               | 8                              |
| <b>D Stakeholders or participants</b>   |                                                                             |                                                                                                                                                                                                                    |                                |
| 12                                      | Define the inclusion criteria for stakeholders involved in priority-setting | Patients, caregivers, general community, health professionals, researchers, policy makers, non-governmental organizations, government, industry; specific groups including vulnerable and marginalized populations | 7                              |
| 13                                      | State the strategy or method for identifying and engaging stakeholders      | Partnership with organizations, social media, recruitment through hospitals                                                                                                                                        | 7                              |
| 14                                      | Indicate the number of participants and/or organizations involved           | Number of individuals and organizations, include number by stakeholder group                                                                                                                                       | 21 – 22                        |
| 15                                      | Describe the characteristics of stakeholders                                | Stakeholder group, demographic characteristics, areas of interest and expertise, discipline, affiliations                                                                                                          | 21 – 22                        |

|                                                               |                                                                                                                                         |                                                                                                                                                                                                                                                                                                            |                           |
|---------------------------------------------------------------|-----------------------------------------------------------------------------------------------------------------------------------------|------------------------------------------------------------------------------------------------------------------------------------------------------------------------------------------------------------------------------------------------------------------------------------------------------------|---------------------------|
| 16                                                            | State if reimbursement for participation was provided                                                                                   | Cash, vouchers, certificates, acknowledgement; what purpose e.g. travel, accommodation, honorarium                                                                                                                                                                                                         | 11                        |
| <b>E Identification and collection of research priorities</b> |                                                                                                                                         |                                                                                                                                                                                                                                                                                                            |                           |
| 17                                                            | Describe methods for collecting initial priorities                                                                                      | Methods e.g. Delphi survey, surveys, nominal group technique, interviews, focus groups, meetings, workshops; prioritization e.g. voting, ranking; mode e.g. face-to-face, online; may be informed by evidence e.g. systematic reviews, reviews of guidelines/other documents, health technology assessment | 8 – 9                     |
| 18                                                            | Describe methods for collating and categorizing priorities                                                                              | Taxonomy or other framework used to organize, summarise, and aggregate topics or questions                                                                                                                                                                                                                 | 9                         |
| 19                                                            | Describe methods and reasons for modifying (removing, adding, reframing) priorities                                                     | Based on scope, clarity, definition, duplication, other criteria                                                                                                                                                                                                                                           | 9                         |
| 20                                                            | Describe methods for refining or translating priorities into research topics or questions                                               | Reviewed by Steering Committee or project team                                                                                                                                                                                                                                                             | 9                         |
| 21                                                            | Describe methods for checking whether research questions or topics have been answered                                                   | Systematic reviews, evidence mapping, consultation with experts                                                                                                                                                                                                                                            | 9                         |
| 22                                                            | Describe number of research questions or topics                                                                                         | Number of priorities at each stage of the process                                                                                                                                                                                                                                                          | 23                        |
| <b>F Prioritization of research topics/questions</b>          |                                                                                                                                         |                                                                                                                                                                                                                                                                                                            |                           |
| 23                                                            | Describe methods and criteria for prioritizing research topics or questions                                                             | Methods e.g. Delphi survey, surveys, nominal group technique, interviews, focus groups, meetings, workshops; Prioritization e.g. voting, ranking; Mode e.g. face-to-face, online; Criteria e.g. need, feasibility, novelty, equity                                                                         | 9 – 10                    |
| 24                                                            | State the method or threshold for excluding research topics/questions                                                                   | Thresholds for ranking scores, proportions, votes; other criteria                                                                                                                                                                                                                                          | 9 – 10                    |
| <b>G Output</b>                                               |                                                                                                                                         |                                                                                                                                                                                                                                                                                                            |                           |
| 25                                                            | State the approach to formulating the research priorities                                                                               | Area, topic, questions, PICO (population, intervention, comparator, outcome)                                                                                                                                                                                                                               | 9                         |
| <b>H Evaluation and feedback</b>                              |                                                                                                                                         |                                                                                                                                                                                                                                                                                                            |                           |
| 26                                                            | Describe how the process of prioritization was evaluated                                                                                | Survey, workshop                                                                                                                                                                                                                                                                                           | N/A                       |
| 27                                                            | Describe how priorities were fed back to stakeholders and/or to the public; and how feedback (if received) was addressed and integrated | Public meetings or workshop, newsletters, website, email, online presentations                                                                                                                                                                                                                             | 11                        |
| <b>I Implementation</b>                                       |                                                                                                                                         |                                                                                                                                                                                                                                                                                                            |                           |
| 28                                                            | Outline the strategy or action plans for implementing priorities                                                                        | Communication with target audience, via policies and funding                                                                                                                                                                                                                                               | To be described elsewhere |

|                                           |                                                               |                                                                                                                                                                                               |                           |
|-------------------------------------------|---------------------------------------------------------------|-----------------------------------------------------------------------------------------------------------------------------------------------------------------------------------------------|---------------------------|
| 29                                        | Describe plans, strategies, or suggestions to evaluate impact | Integration in decision-making, funding allocation, review of relevant documents                                                                                                              | To be described elsewhere |
| <b>J Funding and conflict of interest</b> |                                                               |                                                                                                                                                                                               |                           |
| 30                                        | State sources of funding                                      | Name sources of funding for the priority-setting exercise; if relevant include the budget and/or cost                                                                                         | 17                        |
| 31                                        | Declare any conflicts or competing interests                  | State any conflicts of interest that may be at an individual level and/or at a contextual level (e.g. political issues, controversies) that may affect the process, output or implementation. | 17                        |
